# Supplementary material
Source: PubMed Central journal article supplement (PMC4547558)
Supplement: NIHMS713810-supplement-Appendix_1.pdf [file NIHMS713810-supplement-Appendix_1.pdf]

## Appendix 1. Baseline Characteristics of Included and Excluded Parturients

|                               | Included (%)<br>n=690,742 | Excluded* (%)<br>n=1,714,553 |
|-------------------------------|---------------------------|------------------------------|
| <b>Maternal Age</b>           |                           |                              |
| <20                           | 44,277 (6.4)              | 138584 (8.1)                 |
| 20-34                         | 496,969 (71.9)            | 1263738 (73.7)               |
| 35-39                         | 119,738 (17.3)            | 251224 (14.7)                |
| ≥40                           | 29,758 (4.3)              | 61007 (3.6)                  |
| <b>Race</b>                   |                           |                              |
| Non-Hispanic white            | 371,615 (53.8)            | 795199 (46.4)                |
| Non-Hispanic black            | 99,624 (14.4)             | 281527 (16.4)                |
| Hispanic                      | 113,495 (16.4)            | 223342 (13)                  |
| Asian or Pacific Islander     | 39,644 (5.7)              | 90254 (5.3)                  |
| Other/missing                 | 66,363 (9.6)              | 324231 (18.9)                |
| <b>Annual delivery volume</b> |                           |                              |
| ≤1000                         | 53,771 (7.8)              | 277,960 (16.2)               |
| 1001-2000                     | 131,438 (19.0)            | 428,812 (25.0)               |
| 2001-4000                     | 323,468 (46.8)            | 719,854 (42.0)               |
| >4000                         | 182,065 (26.4)            | 287,927 (16.8)               |
| <b>Antepartum conditions</b>  |                           |                              |
| Placental abruption           | 6,174 (0.9)               | 14,791 (0.9)                 |
| Placenta previa               | 4,624 (0.7)               | 10,367 (0.6)                 |

Myhre JM, Shilkrot A, Kuklina EV, Callaghan WM, Creanga AA, Kaminsky S. Massive blood transfusion during hospitalization for delivery in New York State, 1998-2007. *Obstet Gynecol* 2013;123.

The authors provided this information as a supplement to their article.

|                                                 |                |                |
|-------------------------------------------------|----------------|----------------|
| Previous cesarean delivery                      | 95,802 (13.9)  | 225,285 (13.1) |
| Intrauterine fetal demise                       | 4,310 (0.6)    | 11,385 (0.7)   |
| <b>Risk factors for atony</b>                   |                |                |
| Chorioamnionitis                                | 11,517 (1.7)   | 28,843 (1.7)   |
| Multiple gestation                              | 16,355 (2.4)   | 31,177 (1.8)   |
| Leiomyomas                                      | 8,876 (1.3)    | 19,080 (1.1)   |
| Severe preeclampsia                             | 6,440 (0.9)    | 16,813 (1.0)   |
| Induction of labor                              | 86,967 (12.6)  | 190,937 (11.1) |
| Cesarean delivery                               | 207,899 (30.1) | 473,361 (27.6) |
| <b>Hemorrhagic complications</b>                |                |                |
| Uterine atony                                   | 11,344 (1.6)   | 28,959 (1.7)   |
| Retained placenta with<br>postpartum hemorrhage | 1,858 (0.3)    | 4,637 (0.3)    |

\*All deliveries from hospitals that did not record a single unit of blood transfused during the year of delivery were excluded from further analysis.

Myhre JM, Shilkrot A, Kuklina EV, Callaghan WM, Creanga AA, Kaminsky S. Massive blood transfusion during hospitalization for delivery in New York State, 1998-2007. *Obstet Gynecol* 2013;123.

The authors provided this information as a supplement to their article.
