# Supplementary material
Source: PubMed Central journal article supplement (PMC4547558)
Supplement: NIHMS713810-supplement-Appendix_2.pdf [file NIHMS713810-supplement-Appendix_2.pdf]

**Appendix 2. Baseline Characteristics of Women Who Received a Massive Blood Transfusion With a Coexisting Diagnosis of Obstetric Hemorrhage and Those Who Received a Massive Blood Transfusion Without a Diagnosis of Obstetric Hemorrhage**

|                               | <b>Massive Blood Transfusion<br/>With a Coexisting Diagnosis<br/>Of Obstetric Hemorrhage<br/>(%)<br/>n=406</b> | <b>Massive Blood Transfusion<br/>Without a Diagnosis of<br/>Obstetric Hemorrhage (%)<br/>n=282</b> |
|-------------------------------|----------------------------------------------------------------------------------------------------------------|----------------------------------------------------------------------------------------------------|
| <b>Maternal Age</b>           |                                                                                                                |                                                                                                    |
| <20                           | 16 (3.9)                                                                                                       | 27 (9.6)                                                                                           |
| 20-34                         | 229 (56.4)                                                                                                     | 182 (64.5)                                                                                         |
| 35-39                         | 118 (29.1)                                                                                                     | 42 (14.9)                                                                                          |
| ≥40                           | 43 (10.6)                                                                                                      | 31 (11.0)                                                                                          |
| <b>Race</b>                   |                                                                                                                |                                                                                                    |
| Non-Hispanic white            | 175 (43.1)                                                                                                     | 92 (32.6)                                                                                          |
| Non-Hispanic black            | 92 (22.7)                                                                                                      | 68 (24.1)                                                                                          |
| Hispanic                      | 66 (16.3)                                                                                                      | 90 (31.9)                                                                                          |
| Asian or Pacific Islander     | 32 (7.9)                                                                                                       | 8 (2.8)                                                                                            |
| Other / Missing               | 41 (10.1)                                                                                                      | 24 (8.5)                                                                                           |
| <b>Annual delivery volume</b> |                                                                                                                |                                                                                                    |
| ≤4000                         | 262 (64.5)                                                                                                     | 66 (24.0)                                                                                          |
| >4000                         | 144 (35.5)                                                                                                     | 216 (76.0)                                                                                         |

Myhre JM, Shilkrot A, Kuklina EV, Callaghan WM, Creanga AA, Kaminsky S. Massive blood transfusion during hospitalization for delivery in New York State, 1998-2007. *Obstet Gynecol* 2013;123.

The authors provided this information as a supplement to their article.

---

**Risk factors for obstetric****hemorrhage**

|                            |            |            |
|----------------------------|------------|------------|
| Previous cesarean delivery | 84 (20.7)  | 40 (14.2)  |
| Intrauterine fetal demise  | 45 (11.1)  | *          |
| Chorioamnionitis           | 21 (5.2)   | 35 (12.4)  |
| Multiple gestation         | 27 (6.7)   | 27 (9.6)   |
| Leiomyomas                 | 24 (5.9)   | *          |
| Severe preeclampsia        | 53 (13.1)  | 41 (14.5)  |
| Induction of labor         | 53 (13.1)  | 57 (20.2)  |
| Cesarean delivery          | 265 (65.3) | 201 (71.3) |

---

\*Categories that include between one and ten individuals are not reported to protect individual patient privacy and in compliance with the data use agreement.

Myhre JM, Shilkrut A, Kuklina EV, Callaghan WM, Creanga AA, Kaminsky S. Massive blood transfusion during hospitalization for delivery in New York State, 1998-2007. *Obstet Gynecol* 2013;123.

The authors provided this information as a supplement to their article.
